1 **Work Status, Functional Recovery, and Quality of Life of Cardiac Arrest Survivors**  
2 **After Hospital Discharge**

3

4 Yi-Wen Wu<sup>1</sup>; Tai-Yuan Chen, MD<sup>1</sup>; Chien-Hua Huang, MD, PhD<sup>1</sup>; Yu-Jen Chu, RN<sup>2</sup>; Wei-  
5 Ting Chen, MD<sup>1</sup>; Kuan-Ting Lu, MD<sup>1</sup>; Wei-Tien Chang, MD, PhD<sup>1</sup>; Hooi-Nee Ong, MD<sup>1</sup>;  
6 Wen-Jone Chen, MD, PhD<sup>1,3</sup>; Min-Shan Tsai, MD, PhD<sup>1</sup>

7

8 <sup>1</sup>Department of Emergency Medicine, National Taiwan University Medical College and  
9 Hospital, Taipei, Taiwan

10 <sup>2</sup>Department of Nursing, National Taiwan University Medical College and Hospital, Taipei,  
11 Taiwan

12 <sup>3</sup>Department of Internal Medicine (Cardiology division), National Taiwan University Medical  
13 College and Hospital, Taipei, Taiwan

14

15

16 **Name and Address of Corresponding Authors:**

17 Min-Shan Tsai, MD, PhD

18 Department of Emergency Medicine, National Taiwan University Hospital

19 No. 7, Zhongshan S. Road, Taipei, Taiwan 100

20 Tel: 886-2-23562831 | FAX: 886-2-23223150

21 E-mail: [mshanmshan@gmail.com](mailto:mshanmshan@gmail.com)

22

23 The study was performed in National Taiwan University Hospital.

24 Short running title: Recovery in cardiac arrest survivors

25 Total word count: 5232 words

26 Abstract word count: 249 words

27

28 \_\_\_\_\_

1 **Abstract**

2 **Background**

3 To investigate the work status, neurological recovery, and quality of life of cardiac arrest  
4 survivors within 1 year after hospital discharge.

5 **Methods**

6 A retrospective single center study included 71 non-traumatic adult cardiac arrest patients  
7 between 2017 and 2020, who survived more than 1 year after hospital discharge and agreed to  
8 participate the study. Questionnaire interviews through telephone visits were conducted with  
9 the enrolled patients, assessing their work status, neurological recovery, and quality of life at 3  
10 months and 1 year after hospital discharge. Additionally, their use of medical services was also  
11 collected.

12 **Results**

13 Of the enrolled patients, 67 (94.4%) had a cerebral performance category (CPC) of 1 at  
14 discharge and the majority of patients (90.1%) returned home. Sixty-seven patients (94.4%)  
15 returned for outpatient visits at a median time of 6 days, 23 patients (32.4%) visited the ER at  
16 a median time of 74 days, and 22 patients (31.0%) were readmitted to the hospital at a median  
17 time of 58 days. In terms of mobility, self-care, usual activities, pain/discomfort, and health  
18 state assessed using the EQ-5D-5L, a significant decrease in impairment was observed from 3  
19 months to 1 year. Moreover, patients demonstrated improved work status as well as improved

1 scores for overall quality of life, general health, physical, psychological, social relations, and  
2 environmental status evaluated using the WHOQOL-BREF.

### 3 **Conclusions**

4 Within 1 year following hospital discharge, a considerable number of cardiac arrest  
5 survivors require medical support. However, a continual improvement in work status and  
6 quality of life were observed.

7

8

9 **Keywords:** Cardiac arrest; Work status; Functional recovery; Quality of life; Medical service

## 1 **Introduction**

2 Advances in cardiopulmonary resuscitation (CPR) have led to a considerable increase in  
3 the successful rate of return of spontaneous circulation (ROSC) following emergency  
4 treatment.<sup>1, 2</sup> The post-cardiac arrest syndrome including damage to the brain and heart after  
5 cardiac arrest contributes to a relatively high mortality rate in the early post-arrest period. With  
6 the introduction of post-arrest care and targeted temperature management (TTM),<sup>3, 4</sup> the  
7 survival rate of patients with cardiac arrest continues to improve, and optimizing the quality of  
8 life and functional outcomes for these survivors after discharge becomes essential. In response  
9 to this requirement, the updated Advanced Cardiovascular Life Support guidelines emphasizes  
10 the importance of recovery in the chain of survival,<sup>5</sup> which is a significant concern for both the  
11 families of survivors and the entire health-care system.

12 Hypoxia and subsequent ischemia-reperfusion injury, along with various sequelae, may  
13 influence physical, cognitive, and psychosocial aspects in cardiac arrest survivors.<sup>6</sup> To evaluate  
14 the physical and mental well-being of these individuals after discharge, numerous studies have  
15 employed various self-assessment scales for quantifying quality of life and psychological  
16 stress.<sup>3, 7-10</sup> Studies have demonstrated that cognitive impairment and emotional problems  
17 have a substantial impact on patients' daily functioning, ability to return to work, and overall  
18 quality of life. Those with poor recovery often experience low participation, fatigue, depression,  
19 and mobility issues.<sup>3, 8</sup> Additionally, patients with a diagnosis of depression or anxiety have a

1 higher long-term mortality rate than those without such conditions.[10](#) The prevalence of  
2 depression, anxiety, and other mental illnesses after out-of-hospital cardiac arrest (OHCA) can  
3 affect patients' health-related quality of life.[9](#)

4 ROSC, survival, and neurological outcomes at hospital discharge are well-established and  
5 acceptable outcome indicators in cardiac arrest research.[11](#) With advances in post-arrest care,  
6 an increasing number of survivors are being successfully discharged, and these clinical  
7 indicators alone may not fully capture the overall recovery and challenges faced by survivors  
8 after hospital discharge. Moreover, evaluations conducted at the time of discharge often do not  
9 adequately consider the challenges faced by survivors when they return home.[11](#) There is a  
10 lack of data concerning the medical service requirement, work status and quality of life of  
11 cardiac arrest survivors after hospital discharge in Asian countries. Whether the work status  
12 and quality of life of cardiac arrest survivors would continuously improve also remains  
13 unknown. Therefore, the current study aimed to evaluate the use of medical service, work status,  
14 neurological recovery, and quality of life of cardiac arrest survivors within 1 year after hospital  
15 discharge.

16

## 1 **Methods**

### 2 Study Design

3 This retrospective study was conducted in National Taiwan University Hospital (NTUH),  
4 a tertiary referral medical centers with approximately 100,000 emergency department (ER)  
5 visits per year in Taipei city, Taiwan. The study protocol was approved by the Institutional  
6 Review Board of NTUH (202107138RIND).

### 7 Study Population

8 Initially, 169 adults with non-traumatic cardiac arrest who survived to hospital discharge  
9 between 2017 and 2020 were recruited. The following patients were excluded: patients who  
10 died within 1 year following hospital discharge (n=42), those who could not be contacted after  
11 hospital discharge (n=35), and those who declined participation in the study (n=21). Ultimately,  
12 a total of 71 patients were included in this study (Figure 1).

13 Telephone visits and questionnaire interviews were conducted for the enrolled patients,  
14 which included assessments of their work status, neurological recovery, and quality of life at 3  
15 months and 1 year after hospital discharge. Work status was defined as being employed in a  
16 salaried position and capable of performing tasks independently without requiring assistance  
17 from others. Neurological function was evaluated using Glasgow–Pittsburgh cerebral  
18 performance category (CPC) scores. CPC scores of 1–2 were defined as favorable neurologic  
19 outcomes and scores of 3–5 as poor neurologic outcomes. Quality of life was assessed using

1 two questionnaires: the EuroQol 5-Dimension, 5-Level Health Scale (EQ-5D-5L) and World  
2 Health Organization Quality of Life-Brief (WHOQOL-BREF). The EQ-5D-5L evaluates  
3 individuals' daily activities and provides insights into their health-related quality of life in  
4 terms of five dimensions.[12](#) [13](#) The WHOQOL-BREF is a widely recognized instrument that  
5 surpasses the conventional assessment of physical and psychological aspects of health-related  
6 quality of life. It also incorporates social relationships and environment, making it a  
7 comprehensive tool for evaluating the overall quality of life.[14](#) Both the EQ-5D-5L and  
8 WHOQOL-BREF were common tools for assessing affective and psychosocial well-being  
9 recommended by the American Heart Association.[11](#)

#### 10 Variables of Cardiac Arrest

11 This study collected baseline characteristics and data on resuscitation events, post-arrest  
12 care, and neurological outcomes of patients during their index admission from medical records.  
13 Initial shockable rhythm was defined as the initial cardiac rhythm recorded as ventricular  
14 fibrillation or ventricular tachycardia. A patient who experienced a recurrent cardiac arrest  
15 event within 1 h after ROSC was considered to have undergone repeated CPR. Cardiac arrest  
16 was considered to have a cardiac cause when ischemic heart disease, structural heart disease,  
17 acute coronary syndrome, heart failure, and arrhythmia without electrolyte imbalance were  
18 identified.[15](#) TTM was applied to patients, with a target temperature of either 33 °C or 36 °C  
19 for 24 h. Extracorporeal membrane oxygenation (ECMO) applied within 7 days following

1 cardiac arrest was recorded in this study. Emergent coronary angiography (CAG) was defined  
2 as CAG performed within 24 h after ROSC.[16](#)

3 This study recorded whether patients visited the outpatient department (OPD) or ER or  
4 were readmitted to the hospital after discharge. The diagnoses obtained during ER visits and  
5 hospital admissions were divided into several categories: cardiovascular (e.g., congestive heart  
6 disease, coronary artery disease, installation of an implantable cardioverter defibrillator, atrial  
7 fibrillation, ischemic cardiomyopathy, and chest pain), pulmonary (e.g., pneumonia and  
8 respiratory failure), infection (e.g., fever, cellulitis, and bacteremia), neurologic (e.g., thalamic  
9 hemorrhage), gastrointestinal (e.g., gastrointestinal symptoms and peptic ulcer diseases),  
10 endocrine/metabolism (e.g., hyperthyroidism and diabetic ketoacidosis), and miscellaneous  
11 (e.g., bruise, laceration wound, pancreatitis, and cholecystitis). Two physicians independently  
12 determined whether the diagnosis was related to the cause of the OHCA. In case of differing  
13 opinions between the two physicians, a third physician made the final judgment. Additionally,  
14 this study assessed the days alive and out of the hospital (DAOH), which was defined as the  
15 number of days during which the patient required no hospitalization and remained out of the  
16 hospital from the time of discharge up to 1 year.[17](#)

### 17 EuroQol 5-Dimension, 5-Level Health Scale (EQ-5D-5L)

18 The EQ-5D-5L, developed by the EuroQol Group, is widely used for assessing health-  
19 related quality of life (HRQoL) worldwide.[18](#) The official EQ-5D-5L Taiwanese version in



1 traditional Chinese characters was used in the current study (Supplementary Table 1).<sup>13</sup> The  
2 questionnaire comprises five dimensions that capture an individual's subjective perception of  
3 their health in the following areas: mobility, self-care, personal activities, pain/discomfort, and  
4 anxiety/expression. Responses are recorded on a 5-point scale, indicating levels of severity. In  
5 this study, patients were asked to rate their overall health status on a scale ranging from 0  
6 (indicating the worst health imaginable) to 100 (indicating the best health imaginable).  
7 In the current study, for each dimension in the EQ-5D-5L questionnaire, a score of  $\geq 3$  points  
8 was considered to indicate “more than moderate impaired,” and the health status scores of  $\leq 60$   
9 were considered to indicate “more than moderate impaired.”

#### 10 World Health Organization Quality of Life-Brief (WHOQOL-BREF)

11 The World Health Organization Quality of Life-Brief-Taiwanese version [WHOQOL-  
12 BREF(TW)] has been adapted for Taiwanese culture and was used in the current  
13 study(Supplementary Table 2).<sup>19</sup> This adaptation comprises two additional items (No.27 and  
14 No.28), resulting in a total of 28 items compared with the number of items in the original  
15 version. Of the questions for 28 items, two questions evaluating the overall condition are not  
16 included. The remaining 26 questions can be divided into four domains: Physical, comprising  
17 a total of 7 questions; psychological, comprising a total of 6 questions; social relationships,  
18 comprising a total of 4 questions; and environment, comprising a total of 9 questions. The item  
19 scores range from 1 (the worst condition) to 5 (the best condition), with the exception of three

1 items (No.3, No.4, and No.26), which are reversely coded.

2 In the current study, all the reverse-coded questions in the WHOQOL-BREF(TW) were  
3 reversed again to obtain a higher score indicating a higher quality of life. To calculate the scores  
4 for each domain, the average scores of all the questions within each domain were multiplied  
5 by 4, resulting in domain scores ranging from 4 to 20.[20](#)

## 6 Statistical Data Analyses

7 Categorical variables between groups were compared using the chi-squared test and are  
8 expressed as numbers and percentages. Continuous variables were compared between groups  
9 by using a Mann Whitney U test and are expressed as medians with quartiles. The repeat  
10 measurement was used to compare continuous variables between 3 months and 1 year. A p  
11 value of <0.05 was considered statistically significant. All statistical analyses were performed  
12 using SPSS Statistics for Windows, version 16.0 (SPSS Inc., Chicago, IL, USA).

## 1 **Results**

2 Table 1 presents the baseline characteristics, CPR events, post-arrest care, and outcomes  
3 of the enrolled patients. Of the 71 patients included in the study, 59 (83.1%) were male, and  
4 the median age was 59 years. In this study sample, 42 (59.2%) had OHCA, 67 (94.4%) had a  
5 witnessed collapse, and 23 (32.4%) regained ROSC before arriving at the ER. Initial shockable  
6 cardiac rhythm was recorded in 44 patients (62.0%), and 58 patients (81.7%) were presumed  
7 to have a cardiac origin of cardiac arrest. Among the enrolled patients, 64 (90.1%) were  
8 discharged to their homes, 4 (5.6%) were transferred to another hospital for further care, and 3  
9 (4.2%) were sent to a nursing home for specialized support after hospital discharge.

10 Table 2 presents the medical service requirements of the enrolled patients after hospital  
11 discharge. Most patients (n=67, 94.4%) returned to the OPD after discharge, with a median  
12 duration of 6 days from discharge to OPD visit. Twenty-three patients (32.4%) ever visited the  
13 ER after discharge, with a median duration of 74 days. Among them, 12 patients (16.9%) first  
14 visited the ER within 90 days after discharge. The diagnoses during ER visits were classified  
15 as follows: cardiovascular (n=8, 34.8%), pulmonary (n=2, 8.7%), infection (n=3, 13.0%),  
16 neurologic (n=1, 4.3%), gastrointestinal (n=2, 8.7%), endocrine/metabolism (n=2, 8.7%), and  
17 miscellaneous (n=5, 21.7%). In 9 patients (39.1%), the diagnoses during ER visits were  
18 considered related to the cause of cardiac arrest. Twenty-two patients (31.0%) were ever  
19 admitted to the hospital, with a median duration of 58 days after hospital discharge. Among

1 them, 12 patients (16.9%) were admitted to the hospital within 90 days after discharge.  
2 Cardiovascular etiology was the main reason for hospital admission (n=13, 59.1%), and during  
3 hospitalization, most etiologies were considered to be related to the cause of cardiac arrest  
4 (n=14, 63.6%). Six patients (27.3%) were hospitalized after an ER visit. The median DAOH  
5 for the enrolled patients within 1 year following discharge was 361 days. A total of 32 patients  
6 (45.0%) ever visited the ER or were admitted during the first year following hospital discharge.  
7 The enrolled patients were further divided into cardiac (n=58) and non-cardiac (n=13) groups  
8 based on the cause of their cardiac arrest. The patients in the cardiac group visited the ER at a  
9 median duration of 62 days and were admitted to the hospital for a median duration of 37 days,  
10 which were earlier than the time points in the non-cardiac group. However, the analysis did not  
11 reveal a significant difference, which may be due to the limited number of patients. The  
12 diagnoses during ER visits and hospitalizations in the cardiac group also tended to be more  
13 correlated with the cause of cardiac arrest than the non-cardiac group (p=0.075). The cardiac  
14 group had more ER visits and included a higher number of patients visiting the ER compared  
15 with the non-cardiac group. Similar findings were observed for hospitalization (Figure 2).

16 Table 3 presents the work status, neurological function, and quality of life of patients at 3  
17 months and 1 year after hospital discharge. Regarding work status, an increased number of  
18 patients were engaged in paid work at 1 year compared with that at 3 months (46.5% vs. 25.4%,  
19 p<0.05). No significant difference in neurological outcomes was observed between these two

1 time points. In the EQ-5D-5L assessment, the number of patients with more than moderate  
2 impairment significantly decreased from 3 months to 1 year in all domains, except for  
3 anxiety/depression. In the WHOQOL-BREF assessment, the scores of all domains were low at  
4 3 months. However, a significant increase in the scores of all domains was observed at 1 year  
5 (Supplementary Table 3). Compared with the non-cardiac group, at 3 months, a higher  
6 proportion of individuals in the cardiac group were able to return to work (31.0% vs. 0%,  
7  $p=0.020$ ). Moreover, the individuals in the cardiac group scored higher for general health and  
8 psychological well-being than the non-cardiac group at 3 months. Both the EQ-5D-5L and  
9 WHOQOL-BREF assessments revealed improvements within the 1-year follow-up period in  
10 the cardiac and non-cardiac groups, and the differences between the groups disappeared at 1  
11 year (Table 4).

## 1 **Discussion**

2       The study retrospectively investigated the medical support requirements, work status,  
3 neurological function, and quality of life of cardiac arrest survivors through telephone survey.  
4 The results revealed that a considerable number of patients had visited the ER and were  
5 readmitted to the hospital within 1 year after discharge. Moreover, at 3 months after discharge,  
6 the work status of the cardiac arrest survivors was low, and their quality of life was poor across  
7 all aspects measured. However, 1 year after discharge, their work status and quality of life were  
8 significantly improved.

9       In the current study, approximately half of the enrolled cardiac arrest survivors required  
10 active medical support within 1 year after discharge, including visits to the ER and  
11 hospitalizations. Moreover, one-third of ER visits and half of hospitalizations occurred within  
12 90 days after discharge. Identifying patients who may require active medical support is crucial  
13 for providing timely and appropriate care.<sup>9</sup> In the current study, cardiovascular diagnoses were  
14 the leading reasons for medical support after discharge, with most hospitalized patients having  
15 diagnoses related to the cause of cardiac arrest. The findings indicate the importance of  
16 conducting thorough cardiovascular evaluations and implementing rehabilitation strategies for  
17 cardiac arrest survivors after hospital discharge. Mion M. et al.<sup>12</sup> proposed comprehensive  
18 post-discharge care guidelines, emphasizing cardiac rehabilitation, psychological support,  
19 lifestyle changes including physical activity and exercise training, and long-term monitoring.

1 In the current study, the cardiac group exhibited higher work status and quality of life than the  
2 non-cardiac group at 3 months, but the difference disappeared at 1 year. This finding indicates  
3 that individualized medical and paramedical support after hospital discharge may be necessary.

4 According to the Victorian Ambulance Cardiac Arrest Registry, 650 of 884 cardiac arrest  
5 survivors (73.5%) returned to work during the 12-month follow-up period. This increased rate  
6 of return to work was attributable to the favorable HRQoL.[21](#) By contrast, in the current study,  
7 the number of patients who returned to work within 1 year after hospital discharge was  
8 considerably lower than that reported in Western countries.[21](#) [22](#) This may be attributed to the  
9 lack of comprehensive rehabilitation programs and cultural differences. Similar to the findings  
10 obtained using the Victorian Ambulance Cardiac Arrest Registry, the results of the current study  
11 demonstrated improvements in work status and quality of life from 3 months to 1 year after  
12 discharge. Additional studies are necessary to elucidate the relationship between quality of life  
13 and work status in cardiac arrest survivors and to identify the factors that may hinder their  
14 return to work.

15 Schlupe M. et al. demonstrated an improvement in the quality of life among cardiac arrest  
16 survivors from 3 months to 1 year after hospital discharge, as assessed using the visual analog  
17 scale of the EQ-5D-5L.[23](#) Posttraumatic symptoms are prevalent in cardiac arrest survivors,  
18 and they can persist even years after the initial cardiac arrest event. These symptoms are  
19 associated with poorer quality of life in both survivors and informal caregivers.[24](#) Notably, in

1 the current study, patients rated psychological demand as considerably lower than physical  
2 demand in the EQ-5D-5L assessment, but not in the WHOQoL-BREF assessment. This  
3 difference may be attributed to the simplicity and directness of the EQ-5D-5L, which might  
4 lead some patients to hesitate or feel embarrassed when expressing their concerns and  
5 frustrations. By contrast, the WHOQoL-BREF has multiple and mixed questions, potentially  
6 providing a more comfortable and comprehensive platform for patients to express their feelings.  
7 This suggests that using a suitable questionnaire is critical for revealing the true condition and  
8 experiences of patients. Specific psychometric questionnaire tailored to the needs of cardiac  
9 arrest survivors may be required in future investigations to provide a more in-depth  
10 understanding of their psychological well-being and quality of life. Early and prompt delivery  
11 of interventions can improve the quality of life for cardiac arrest survivors, leading to  
12 improvements in their overall emotional states and alleviation of anxiety.<sup>22</sup> Establishing a  
13 comprehensive follow-up protocol and implementing effective health policies for cardiac arrest  
14 survivors are crucial.

15 The current study has several limitations. First, the questionnaire survey was conducted  
16 retrospectively; the results may be affected by the memory recall bias among participants.  
17 Patients may also tend to underestimate or overestimate their health status. Second, the majority  
18 of patients included in the study had a cardiac origin of cardiac arrest, which may have resulted  
19 in a more favorable prognosis and recovery compared with patients with non-cardiac causes of



1 arrest. Therefore, the findings may not be generalizable to other populations, particularly those  
2 with non-cardiac causes of cardiac arrest. Third, the study could not retrospectively evaluate  
3 intelligence and cognitive function. Therefore, the status and changes in the patient's  
4 intelligence and logical thinking over time could not be assessed. Future studies should  
5 consider evaluating intelligence and logical thinking. Finally, the study excluded individuals  
6 who did not survive the 1-year follow-up period and those who could not be contacted or who  
7 declined participation in the study. This exclusion may result in potential selection bias, as these  
8 individuals may represent a group in need of even more assistance and support than the patients  
9 enrolled in the study.

10

## 11 **Conclusion**

12 This study demonstrated that within 1 year after hospital discharge, a large portion of  
13 cardiac arrest survivors require medical support, and that their work status and quality of life  
14 continually improved within the first year.

15

## 16 **Disclosures**

17 The authors declare no conflicts of interest for this study.

## 1   **References**

- 2   1.     Myat A, Song KJ, Rea T. Out-of-hospital cardiac arrest: Current concepts. *Lancet*.  
3         2018;391:970-979
- 4   2.     Panchal AR, Bartos JA, Cabanas JG, Donnino MW, Drennan IR, Hirsch KG, Kudenchuk  
5         PJ, Kurz MC, Lavonas EJ, Morley PT, et al. Part 3: Adult basic and advanced life  
6         support: 2020 american heart association guidelines for cardiopulmonary  
7         resuscitation and emergency cardiovascular care. *Circulation*. 2020;142:S366-S468
- 8   3.     Nolan JP, Sandroni C, Bottiger BW, Cariou A, Cronberg T, Friberg H, Genbrugge C,  
9         Haywood K, Lilja G, Moulaert VRM, et al. European resuscitation council and  
10        european society of intensive care medicine guidelines 2021: Post-resuscitation care.  
11        *Intensive Care Med*. 2021;47:369-421
- 12  4.     Dankiewicz J, Cronberg T, Lilja G, Jakobsen JC, Levin H, Ullen S, Rylander C, Wise MP,  
13         Oddo M, Cariou A, et al. Hypothermia versus normothermia after out-of-hospital  
14         cardiac arrest. *N Engl J Med*. 2021;384:2283-2294
- 15  5.     Merchant RM, Topjian AA, Panchal AR, Cheng A, Aziz K, Berg KM, Lavonas EJ, Magid  
16         DJ, Adult B, Advanced Life Support PB, et al. Part 1: Executive summary: 2020  
17         american heart association guidelines for cardiopulmonary resuscitation and  
18         emergency cardiovascular care. *Circulation*. 2020;142:S337-S357
- 19  6.     Rey JR, Caro-Codon J, Rodriguez Sotelo L, Lopez-de-Sa E, Rosillo SO, Gonzalez

- 1           Fernandez O, Fernandez de Bobadilla J, Iniesta AM, Pena Conde L, Antorrena
- 2           Miranda I, et al. Long term clinical outcomes in survivors after out-of-hospital cardiac
- 3           arrest. *Eur J Intern Med.* 2020;74:49-54
- 4    7.       Lilja G, Nilsson G, Nielsen N, Friberg H, Hassager C, Koopmans M, Kuiper M, Martini
- 5           A, Mellinshoff J, Pelosi P, et al. Anxiety and depression among out-of-hospital cardiac
- 6           arrest survivors. *Resuscitation.* 2015;97:68-75
- 7    8.       Lilja G, Nielsen N, Bro-Jeppesen J, Dunford H, Friberg H, Hofgren C, Horn J, Insorsi A,
- 8           Kjaergaard J, Nilsson F, et al. Return to work and participation in society after out-of-
- 9           hospital cardiac arrest. *Circ Cardiovasc Qual Outcomes.* 2018;11:e003566
- 10  9.       Djarv T, Bremer A, Herlitz J, Israelsson J, Cronberg T, Lilja G, Rawshani A, Arestedt K.
- 11           Health-related quality of life after surviving an out-of-hospital compared to an in-
- 12           hospital cardiac arrest: A swedish population-based registry study. *Resuscitation.*
- 13           2020;151:77-84
- 14  10.       Lee J, Cho Y, Oh J, Kang H, Lim TH, Ko BS, Yoo KH, Lee SH. Analysis of anxiety or
- 15           depression and long-term mortality among survivors of out-of-hospital cardiac arrest.
- 16           *JAMA Netw Open.* 2023;6:e237809
- 17  11.       Sawyer KN, Camp-Rogers TR, Kotini-Shah P, Del Rios M, Gossip MR, Moitra VK,
- 18           Haywood KL, Dougherty CM, Lubitz SA, Rabinstein AA, et al. Sudden cardiac arrest
- 19           survivorship: A scientific statement from the american heart association. *Circulation.*

- 1           2020;141:e654-e685
- 2   12.    Mion M, Simpson R, Johnson T, Oriolo V, Gudde E, Rees P, Quinn T, Vopelius-Feldt VJ,  
3           Gallagher S, Mozid A, et al. British cardiovascular intervention society consensus  
4           position statement on out-of-hospital cardiac arrest 2: Post-discharge rehabilitation.  
5           *Interv Cardiol.* 2022;17:e19
- 6   13.    Devlin N, Pickard S, Busschbach J. The development of the eq-5d-5l and its value sets.  
7           In: Devlin N, Roudijk B, Ludwig K, eds. *Value sets for eq-5d-5l: A compendium,*  
8           *comparative review & user guide.* Cham (CH); 2022:1-12.
- 9   14.    Skevington SM, Epton T. How will the sustainable development goals deliver changes  
10          in well-being? A systematic review and meta-analysis to investigate whether whoqol-  
11          bref scores respond to change. *BMJ Glob Health.* 2018;3:e000609
- 12   15.    Ling DA, Huang CH, Chen WJ, Chuang PY, Chang WT, Sung CW, Chen WT, Ong HN, Tsai  
13          MS. Impact of protocolized postarrest care with targeted temperature management  
14          on the outcomes of cardiac arrest survivors without temperature management. *Ann*  
15          *Med.* 2022;54:63-70
- 16   16.    Chen WT, Tsai MS, Huang CH, Chang WT, Chen WJ. Protocolized post-cardiac arrest  
17          care with targeted temperature management. *Acta Cardiol Sin.* 2022;38:391-399
- 18   17.    Sanchis J, Bueno H, Minana G, Guerrero C, Marti D, Martinez-Selles M, Dominguez-  
19          Perez L, Diez-Villanueva P, Barrabes JA, Marin F, et al. Effect of routine invasive vs

- 1 conservative strategy in older adults with frailty and non-st-segment elevation acute  
2 myocardial infarction: A randomized clinical trial. *JAMA Intern Med.* 2023;183:407-  
3 415
- 4 18. Devlin NJ, Brooks R. Eq-5d and the euroqol group: Past, present and future. *Appl*  
5 *Health Econ Health Policy.* 2017;15:127-137
- 6 19. Yao G, Chung CW, Yu CF, Wang JD. Development and verification of validity and  
7 reliability of the whoqol-bref taiwan version. *J Formos Med Assoc.* 2002;101:342-351
- 8 20. Health organization. (1998). Programme on mental health : Whoqol user manual,  
9 2012 revision. World health organization. (accessed may 10, 2023, at:  
10 [https://apps.who.int/iris/bitstream/handle/10665/77932/who\\_his\\_hsi\\_rev.2012.03](https://apps.who.int/iris/bitstream/handle/10665/77932/who_his_hsi_rev.2012.03_eng.Pdf?Sequence=1&isallowed=y)  
11 [\\_eng.Pdf?Sequence=1&isallowed=y](https://apps.who.int/iris/bitstream/handle/10665/77932/who_his_hsi_rev.2012.03_eng.Pdf?Sequence=1&isallowed=y)).
- 12 21. Kearney J, Dyson K, Andrew E, Bernard S, Smith K. Factors associated with return to  
13 work among survivors of out-of-hospital cardiac arrest. *Resuscitation.* 2020;146:203-  
14 212
- 15 22. Moolaert VR, van Heugten CM, Winkens B, Bakx WG, de Krom MC, Gorgels TP, Wade  
16 DT, Verbunt JA. Early neurologically-focused follow-up after cardiac arrest improves  
17 quality of life at one year: A randomised controlled trial. *Int J Cardiol.* 2015;193:8-16
- 18 23. Schlupe M, Endeman H, Gravesteijn BY, Kuijs C, Blans MJ, van den Bogaard B, Van  
19 Gemert A, Hukshorn CJ, van der Meer BJM, Knook AHM, et al. In-depth assessment

- 1 of health-related quality of life after in-hospital cardiac arrest. *J Crit Care*.
- 2 2022;68:22-30
- 3 24. Presciutti A, Newman MM, Grigsby J, Vranceanu AM, Shaffer JA, Perman SM.
- 4 Associations between posttraumatic stress symptoms and quality of life in cardiac
- 5 arrest survivors and informal caregivers: A pilot survey study. *Resusc Plus*.
- 6 2021;5:100085
- 7

**Table 1. Characteristics, CPR events and outcomes of enrolled patients**

|                             | Overall<br>n = 71 |
|-----------------------------|-------------------|
| <b>Sex (male)</b>           | 59 (83.1)         |
| <b>Age (years)</b>          | 59 (50-67)        |
| <b>Source</b>               |                   |
| OHCA                        | 42 (59.2)         |
| <b>Past Medical History</b> |                   |
| Diabetes mellitus           | 18 (25.4)         |
| Hypertension                | 42 (59.2)         |
| CAD                         | 21 (29.6)         |
| Heart failure               | 4 (5.6)           |
| Arrhythmia                  | 11 (15.5)         |
| COPD                        | 5 (7.0)           |
| Renal disease               | 5 (7.0)           |
| ESRD                        | 6 (8.5)           |
| CVA                         | 4 (5.6)           |
| Hyperlipidemia              | 12 (16.9)         |
| Malignancy                  | 4 (5.6)           |
| <b>Pre-arrest CPC=1</b>     | 71 (100.0)        |
| <b>Living in home</b>       | 66 (93.0)         |
| <b>CPR event</b>            |                   |
| Witnessed collapse          | 67 (94.4)         |
| Prehospital ROSC            | 23 (32.4)         |
| Initial shockable rhythm    | 44 (62.0)         |
| Total CPR duration (min)    | 11 (4-24)         |
| Repeated CPR                | 10 (14.1)         |
| Presumed cardiogenic arrest | 58 (81.7)         |
| <b>Post-arrest care</b>     |                   |
| TTM                         | 20 (28.2)         |
| ECMO                        | 19 (26.8)         |
| Emergent CAG                | 48 (67.6)         |
| <b>Hospital discharge</b>   |                   |
| Disposition                 |                   |
| Home                        | 64 (90.1)         |
| Transfer to other hospital  | 4 (5.6)           |
| Nursing home                | 3 (4.2)           |
| CPC=1                       | 67 (94.4)         |
| CPC=2                       | 2 (2.8)           |
| Hospitalization (day)       | 14 (9-29)         |

Data presented as no. (%) or as median (IQR).

CAD= coronary artery disease; CAG= coronary angiography; CCU=cardiac care unit; COPD=

chronic obstructive lung disease; CPC= Cerebral Performance Category; CPR=

cardiopulmonary resuscitation; CVA= cerebrovascular accident; ECMO= extracorporeal

membrane oxygenation; ESRD= end-stage renal disease; IHCA=in-hospital cardiac arrest;

OHCA= out-of-hospital cardiac arrest; ROSC= return of spontaneous circulation; TTM=

targeted temperature management



**Table 2. The requirement of medical service after hospital discharge**

|                                                    | <b>Overall<br/>n = 71</b> | <b>Cardiac<br/>n=58</b> | <b>Non-Cardiac<br/>n=13</b> | <b>p-value</b> |
|----------------------------------------------------|---------------------------|-------------------------|-----------------------------|----------------|
| <b>OPD visiting</b>                                | 67 (94.4)                 | 56 (96.6)               | 11 (84.6)                   | 0.092          |
| First OPD visiting after discharge (day)           | 6 (4-9)                   | 7 (5-9)                 | 5 (4-7)                     | 0.101          |
| <b>ER visiting after hospital discharge</b>        | 23 (32.4)                 | 20 (34.5)               | 3 (23.1)                    | 0.427          |
| First ER visiting after discharge (day)            | 74 (22-286)               | 62 (20-147)             | 286 (268-298)               | 0.100          |
| First ER visiting diagnosis                        |                           |                         |                             |                |
| Cardiovascular                                     | 8/23 (34.8)               | 8 (40.0)                | 0 (0)                       |                |
| Pulmonary                                          | 2/23 (8.7)                | 2 (10.0)                | 0 (0)                       |                |
| Infection                                          | 3/23 (13.0)               | 2 (10.0)                | 1 (33.3)                    |                |
| Neurologic                                         | 1/23 (4.3)                | 1 (5.0)                 | 0 (0)                       |                |
| Gastrointestinal                                   | 2/23 (8.7)                | 2 (10.0)                | 0 (0)                       |                |
| Endocrine/Metabolism                               | 2/23 (8.7)                | 1 (5.0)                 | 1 (33.3)                    |                |
| Miscellaneous                                      | 5/23 (21.7)               | 4 (20.0)                | 1 (33.3)                    |                |
| ER diagnosis related to CA cause                   | 9/23 (39.1)               | 8 (40.0)                | 1 (33.3)                    | 0.825          |
| <b>Hospital admission after hospital discharge</b> | 22 (31.0)                 | 18 (31.0)               | 4 (30.8)                    | 0.985          |
| First hospitalization after discharge (day)        | 58 (20-257)               | 37 (20-166)             | 347 (133-905)               | 0.173          |
| First hospital admission diagnosis                 |                           |                         |                             |                |
| Cardiovascular                                     | 13/22 (59.1)              | 13 (72.2)               | 0 (0)                       |                |
| Pulmonary                                          | 3/22 (13.6)               | 3 (16.7)                | 0 (0)                       |                |
| Infection                                          | 1/22 (4.5)                | 0 (0)                   | 1 (25.0)                    |                |
| Neurologic                                         | 1/22 (4.5)                | 1 (5.6)                 | 0 (0)                       |                |
| Endocrine/Metabolism                               | 2/22 (9.1)                | 1 (5.6)                 | 1 (25.0)                    |                |
| Autoimmune                                         | 1/22 (4.5)                | 0 (0)                   | 1 (25.0)                    |                |
| Miscellaneous                                      | 1/22 (4.5)                | 0 (0)                   | 1 (25.0)                    |                |
| Hospitalization diagnosis related to CA cause      | 14/22 (63.6)              | 13 (72.2)               | 1 (25.0)                    | 0.076          |
| DAOH from discharge to 1 year (day)                | 361 (351-363)             | 362 (352-363)           | 344 (326-362)               | 0.247          |

Data presented as no. (%) or as median (IQR).

ER= emergency room; CA= cardiac arrest; OPD= outpatient department; DAOH= days alive

and out of the hospital

**Table 3. Work, neurological recovery and life quality after hospital discharge**

|                                               | Overall (n = 71) |                  | <i>p-value</i> |
|-----------------------------------------------|------------------|------------------|----------------|
|                                               | 3 months         | 1 year           |                |
| <b>Work</b>                                   | 18 (25.4)        | 33 (46.5)        | 0.009          |
| <b>Favorable neurological outcome</b>         |                  |                  |                |
| CPC=1                                         | 63 (88.7)        | 66 (93.0)        | 0.383          |
| CPC=2                                         | 6 (8.5)          | 3 (4.2)          | 0.301          |
| <b>EQ-5D-5L (more than moderate impaired)</b> |                  |                  |                |
| Mobility                                      | 53 (74.6)        | 17 (23.9)        | <0.001         |
| Self-care                                     | 53 (74.6)        | 18 (25.4)        | <0.001         |
| Usual activities                              | 53 (74.6)        | 17 (23.9)        | <0.001         |
| Pain/discomfort                               | 52 (73.2)        | 18 (25.4)        | <0.001         |
| Anxiety/depression                            | 22 (31.0)        | 10 (14.1)        | 0.159          |
| Health state                                  | 48 (67.6)        | 11 (15.5)        | <0.001         |
| <b>WHOQOL-BREF(score range)</b>               |                  |                  |                |
| Overall QOL (1–5)                             | 3 (2-4)          | 4 (4-5)          | <0.001         |
| General health (1–5)                          | 3 (2-4)          | 4 (4-5)          | <0.001         |
| Physical (4-20)                               | 11.4 (9.1-14.3)  | 16.0 (13.7-19.4) | <0.001         |
| Psychological (4-20)                          | 12.0 (10.7-14.7) | 16.0 (14.0-18.0) | <0.001         |
| Social relationships (4–20)                   | 13.0 (11.0-16.0) | 16.0 (13.0-17.0) | <0.001         |
| Environment (4-20)                            | 14.7 (12.0-16.0) | 16.4 (15.6-18.7) | <0.001         |

Data presented as no. (%) or as median (IQR).

CPC= Cerebral Performance Category; EQ-5D-5L= EuroQol 5-Dimension, 5-Level Health

Scale; QOL= Quality of Life; WHOQOL-BREF= World Health Organization Quality of Life-Brief

**Table 4. Work and quality of life between the cardiac and non-cardiac groups**

|                                               | <b>Overall<br/>n = 71</b> | <b>Cardiac<br/>n=58</b> | <b>Non-Cardiac<br/>n=13</b> | <b><i>p-value</i></b> |
|-----------------------------------------------|---------------------------|-------------------------|-----------------------------|-----------------------|
| <b>3 months</b>                               |                           |                         |                             |                       |
| <b>Work</b>                                   | 18 (25.4)                 | 18 (31.0)               | 0 (0)                       | 0.020                 |
| <b>EQ-5D-5L (more than moderate impaired)</b> |                           |                         |                             |                       |
| Mobility                                      | 53 (74.6)                 | 43 (74.1)               | 10 (76.9)                   | 0.835                 |
| Self-care                                     | 53 (74.6)                 | 42 (72.4)               | 11 (84.6)                   | 0.361                 |
| Usual activities                              | 53 (74.6)                 | 44 (75.9)               | 9 (69.2)                    | 0.619                 |
| Pain/discomfort                               | 52 (73.2)                 | 42 (72.4)               | 10 (76.9)                   | 0.740                 |
| Anxiety/depression                            | 22 (31.0)                 | 18 (31.0)               | 4 (30.8)                    | 0.985                 |
| Health state (<60 points)                     | 48 (67.6)                 | 38 (65.5)               | 10 (76.9)                   | 0.427                 |
| <b>WHOQOL-BREF(score range)</b>               |                           |                         |                             |                       |
| Overall QOL (1–5)                             | 3 (2-4)                   | 3 (3-4)                 | 2 (2-3)                     | 0.064                 |
| General health (1–5)                          | 3 (2-4)                   | 3 (3-4)                 | 2 (1-3)                     | 0.044                 |
| Physical (4-20)                               | 11.4 (9.1-14.3)           | 12.0 (9.7-14.3)         | 10.9 (6.3-12.0)             | 0.156                 |
| Psychological (4-20)                          | 12.0 (10.7-14.7)          | 12.0 (11.3-14.7)        | 10.7 (8.0-11.3)             | 0.042                 |
| Social relationships (4–20)                   | 13.0 (11.0-16.0)          | 13.0 (12.0-16.0)        | 11.0 (10.0-16.0)            | 0.238                 |
| Environment (4-20)                            | 14.7 (12.0-16.0)          | 14.9 (12.4-15.6)        | 14.7 (11.1-16.0)            | 0.811                 |
| <b>1 year</b>                                 |                           |                         |                             |                       |
| <b>Work</b>                                   | 33 (46.5)                 | 29 (50.0)               | 4 (30.8)                    | 0.209                 |
| <b>EQ-5D-5L (more than moderate impaired)</b> |                           |                         |                             |                       |
| Mobility                                      | 17 (23.9)                 | 13 (22.4)               | 4 (30.8)                    | 0.523                 |
| Self-care                                     | 18 (25.4)                 | 13 (22.4)               | 5 (38.5)                    | 0.229                 |
| Usual activities                              | 17 (23.9)                 | 12 (20.7)               | 5 (38.5)                    | 0.175                 |
| Pain/discomfort                               | 18 (25.4)                 | 13 (22.4)               | 5 (38.5)                    | 0.229                 |
| Anxiety/depression                            | 10 (14.1)                 | 7 (12.1)                | 3 (23.1)                    | 0.302                 |
| Health state (<60 points)                     | 11 (15.5)                 | 7 (12.1)                | 4 (30.8)                    | 0.092                 |
| <b>WHOQOL-BREF(score range)</b>               |                           |                         |                             |                       |
| Overall QOL (1–5)                             | 4 (4-5)                   | 4 (4-5)                 | 4 (3-5)                     | 0.140                 |
| General health (1–5)                          | 4 (4-5)                   | 4 (4-5)                 | 4 (3-5)                     | 0.090                 |
| Physical (4-20)                               | 16.0 (13.7-19.4)          | 16.0 (14.3-19.4)        | 14.9 (12.6-17.1)            | 0.085                 |
| Psychological (4-20)                          | 16.0 (14.0-18.0)          | 16.0 (15.3-18.0)        | 16.0 (12.7-17.3)            | 0.086                 |
| Social relationships (4–20)                   | 16.0 (13.0-17.0)          | 16.0 (13.0-17.0)        | 15.0 (13.0-16.0)            | 0.163                 |
| Environment (4-20)                            | 16.4 (15.6-18.7)          | 16.7 (15.6-18.7)        | 16.0 (15.6-17.8)            | 0.397                 |

Data presented as no. (%) or as median (IQR).

EQ-5D-5L= EuroQol 5-Dimension, 5-Level Health Scale; QOL= Quality of Life; WHOQOL-

BREF= World Health Organization Quality of Life-Brief

## Figures with Figure Legends

Figure 1. Flowchart of patient enrollment

Figure 2. The visiting and patient numbers of ER visiting and hospitalization between the cardiac and non-cardiac groups.

(A) Visiting number (B) Patient number

\*  $p < 0.05$

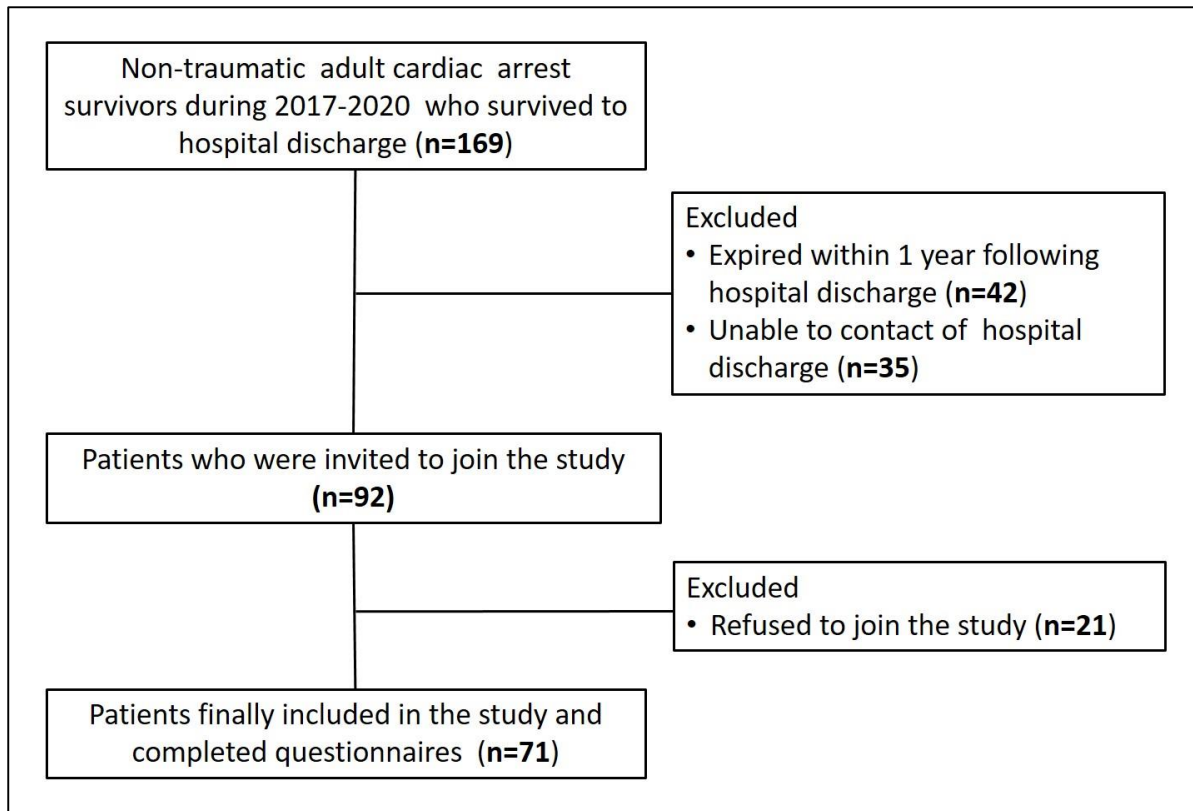

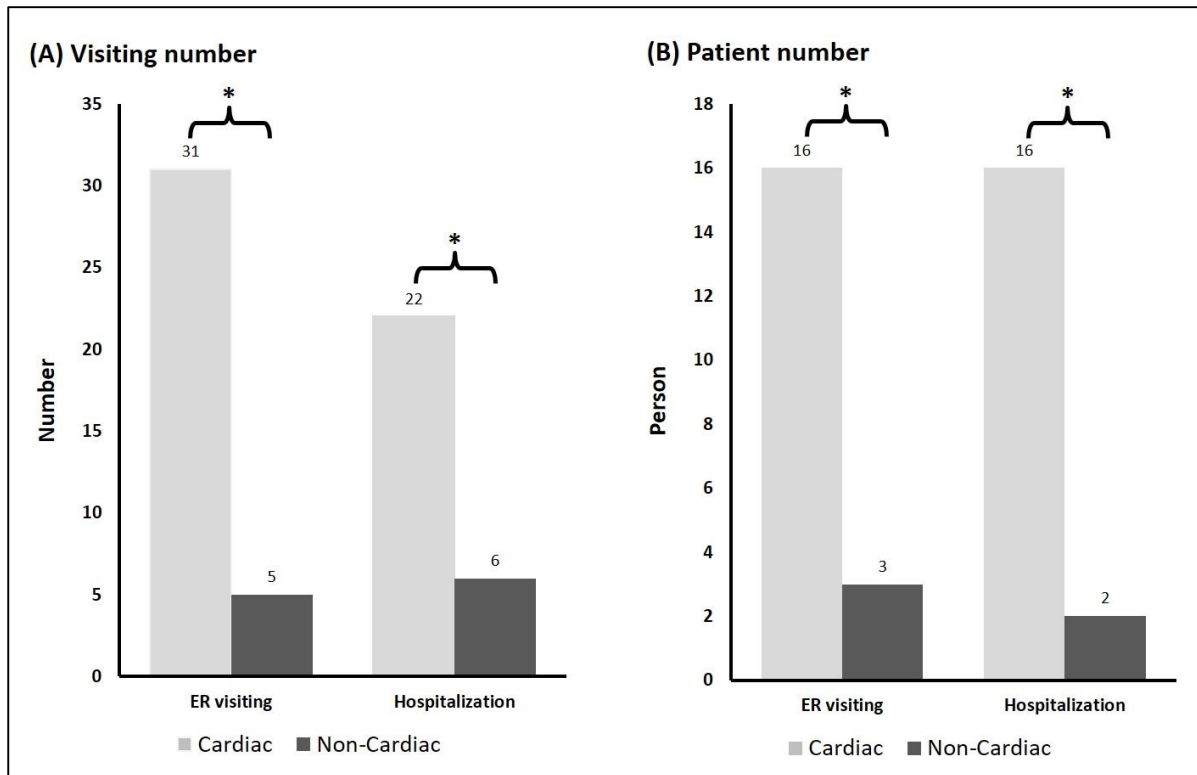

Source: https://medrxiv.org/content/10.1101/2023.08.29.23294804v1.full.pdf
